# Supplementary material for: Characterization of Nanoprecipitated PET Nanoplastics by 1H NMR and Impact of Residual Ionic Surfactant on Viability of Human Primary Mononuclear Cells and Hemolysis of Erythrocytes
Source: MDPI journal article supplement (doi:10.3390/polym15244703), 2023-12-13
Supplement: s1 [file s1]

## Supplementary material

### **Characterization of nanoprecipitated PET nanoplastics by $^1\text{H}$ NMR and impact of residual ionic surfactant on viability of human primary mononuclear cells and hemolysis of erythrocytes**

Milica Djapovic <sup>1</sup>, Danijela Apostolovic <sup>2</sup>, Vojislava Postic <sup>1</sup>, Tamara Lujic <sup>1</sup>, Vesna Jovanovic <sup>1</sup>, Dragana Stanic-Vucinic <sup>1</sup>, Marianne van Hagec<sup>2</sup>, Veselin Maslak<sup>1\*</sup> and Tanja Cirkovic Velickovic <sup>1,3,\*</sup>

<sup>1</sup>University of Belgrade - Faculty of Chemistry, Studentski trg 12-16, 11158 Belgrade, Serbia

<sup>2</sup>Immunology and Allergy Division, Center for Molecular Medicine, Department of Medicine Solna, Karolinska Institutet, Stockholm, Sweden

<sup>3</sup>Serbian Academy of Sciences and Arts, Knez Mihajlova 35, 11102 Belgrade, Serbia

**\*Corresponding authors**

E-mail address: tcirkov@chem.bg.ac.rs (T. Cirkovic Velickovic); vmaslak@chem.bg.ac.rs (V. Maslak)

## Preparation of PET NPs

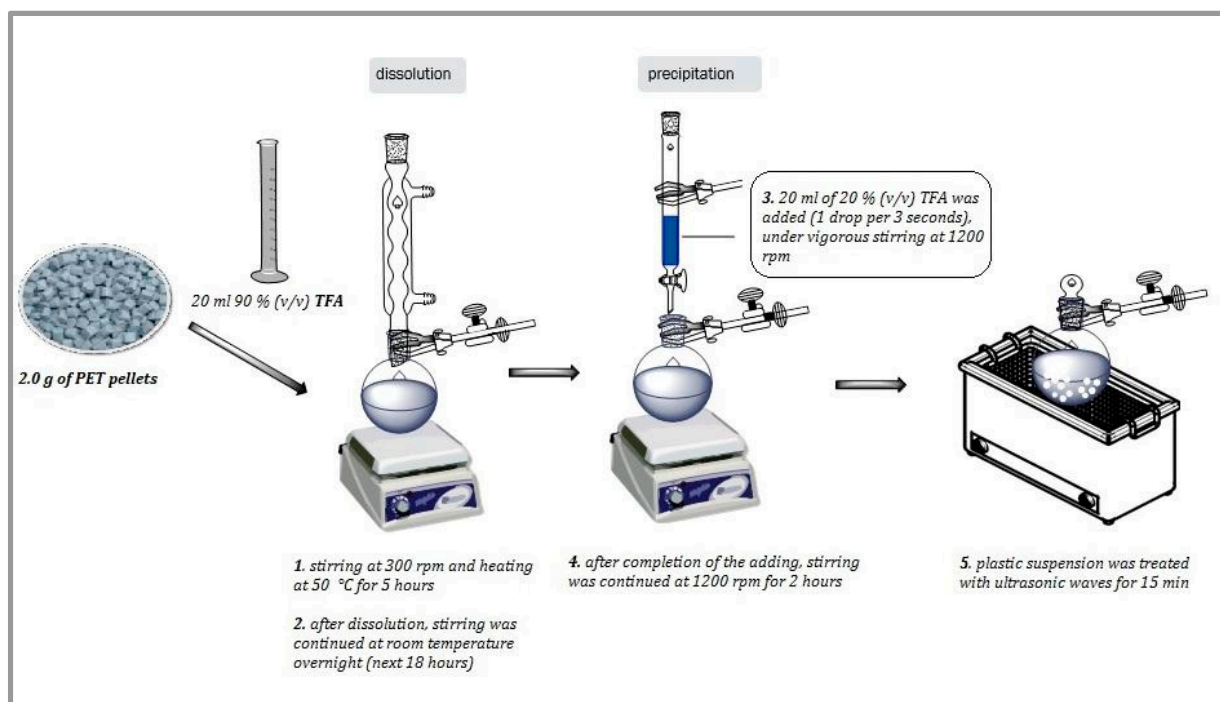

**Figure S1.** Overall scheme of nPET production procedure. First, 2.0 g of PET pellets was dissolved in 20.0 mL of TFA in Mili-Q water (*v/v*) with stirring at 300 rpm for five hours at 50 °C and next 18h at room temperature. Then, 20 mL of 20% TFA in Milli-Q water (*v/v*) was added dropwise during 110 min (1 drop of 10  $\mu$ L per 3 s), under vigorous stirring at 1200 rpm using a dropping funnel. Stirring of suspension was continued for an additional 2 hours, before being sonicated in an ultrasonic bath for 15 min.

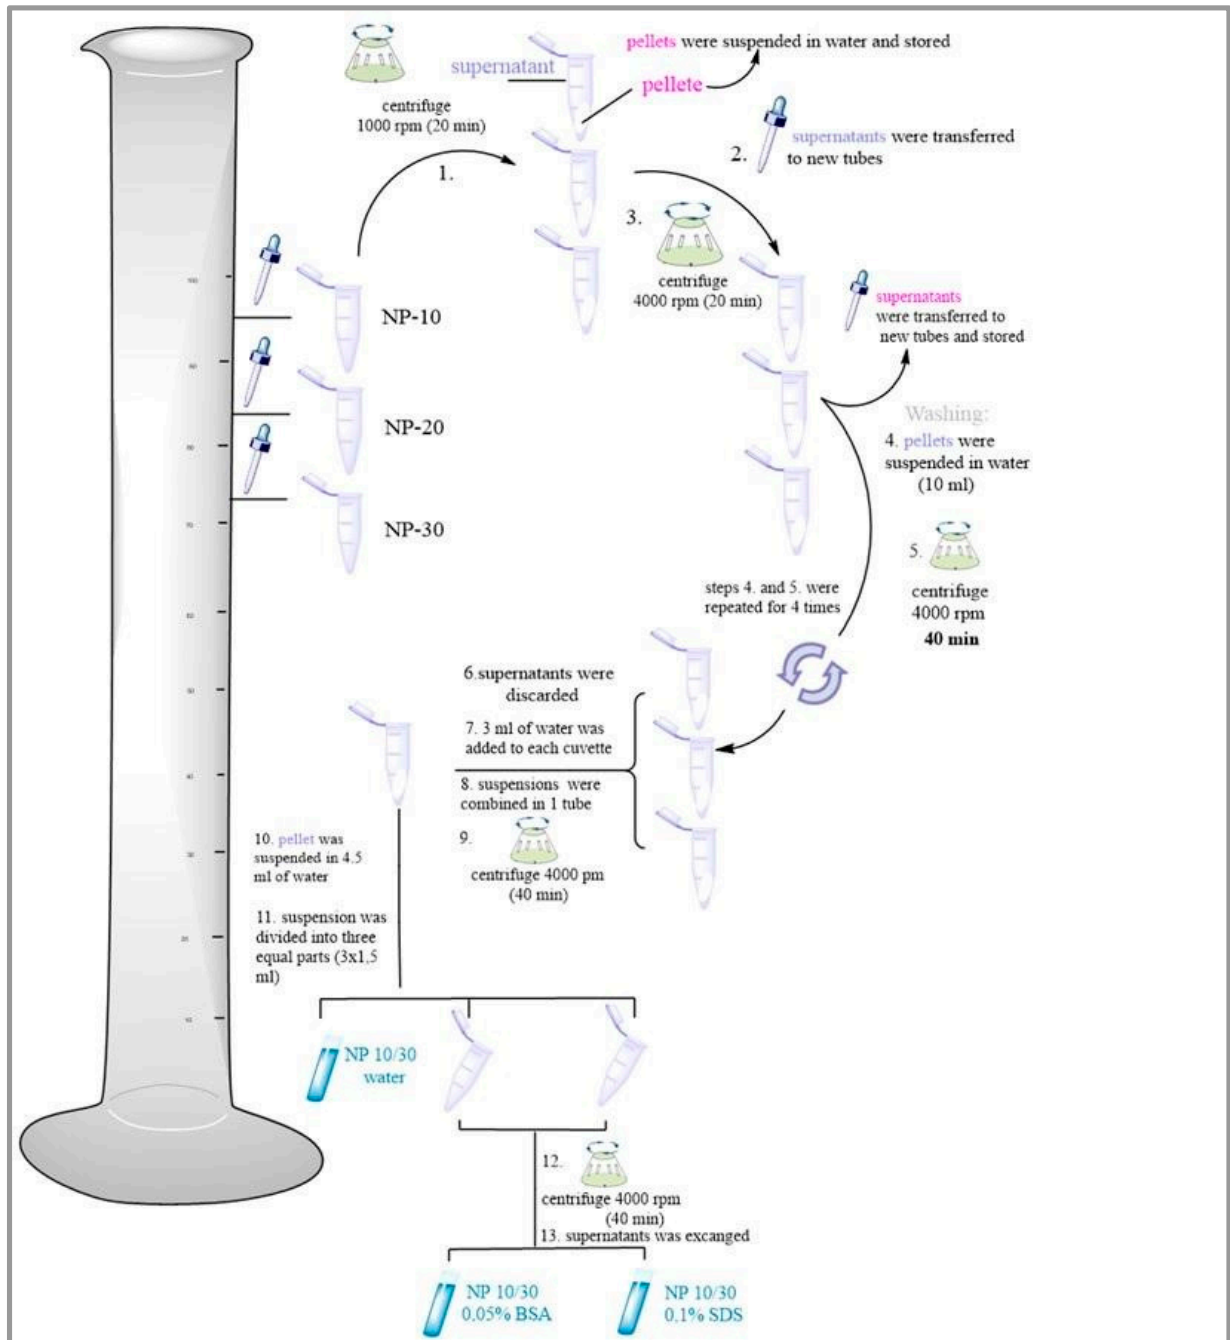

**Figure S2.** Schematic illustration of washing and size separation processes of the first three fractions (each 10 mL), denoted NP-10, NP-20 and NP-30.

## Characterization of PET NPs

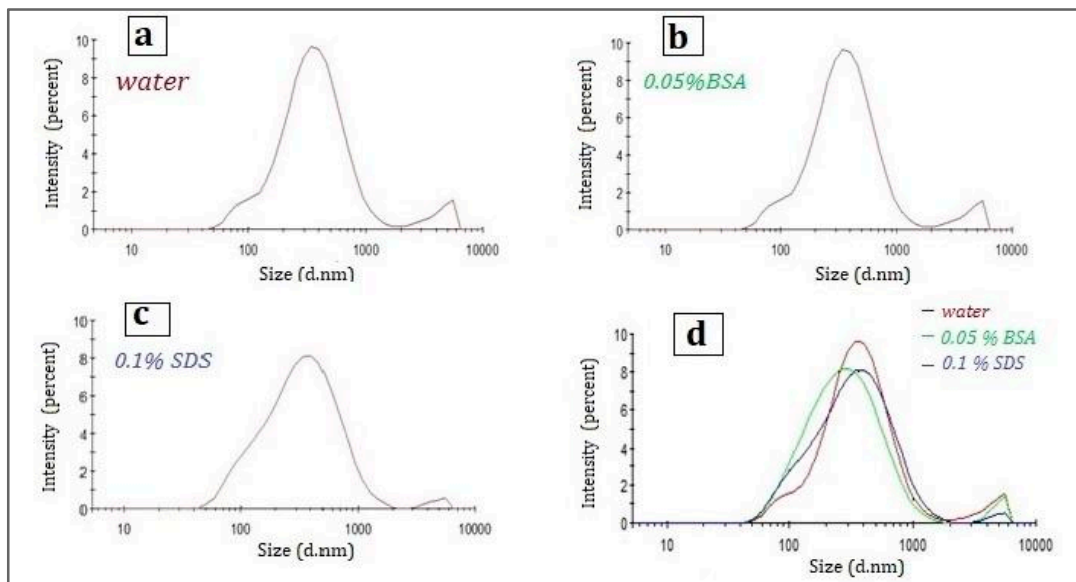

**Figure S3.** Size distributions (by **intensity percentage**) of NPs **washed** suspended in different dispersants ((a)-water, (b)-BSA (0.05%), (c)-SDS (0.1 %)); (d)-combined graphs of different dispersants. Size distributions are shown for NPs obtained from combined fractions: NP-10, NP-20 and NP-30.

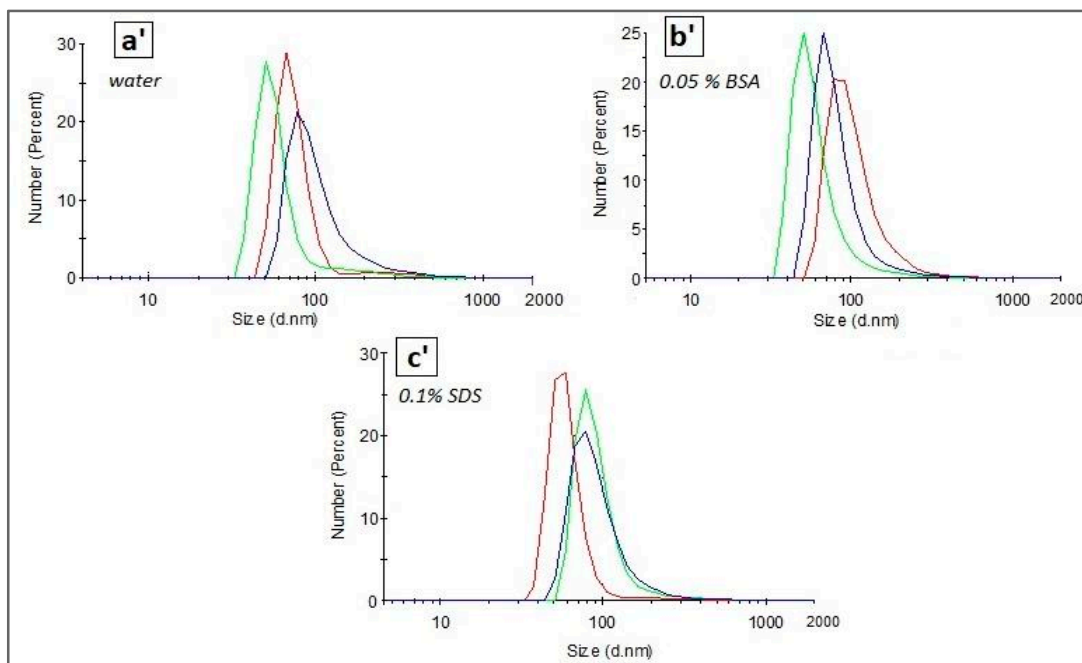

**Figure S4.** Size distributions (by **number percentage**) of NPs **washed** suspended in different dispersants: ((a')-water, (b')-BSA (0.05%), (c')-SDS (0.1 %)). Distributions are shown for NPs obtained from combined fractions: NP-10, NP-20 and NP-30. Additionally multiple consecutive measurements (lines with different colors) are presented.

**Table S1.** Hydrodynamic diameter (d.nm) and polydispersity index of **NPs washed** obtained from combined fractions: NP-10, NP-20 and NP-30 (denoted **NP-10+NP-20+NP-30**); NP-40, NP-50 and NP-60 (denoted **NP-40+NP-50+NP-60**); NP-70, NP-80 and NP-90 (denoted **NP-70+NP-80+NP-90**) dispersed in different dispersants: water, 0.05% BSA and 0.1% SDS.

|                             | dispersant | NPS washed        |                   |                   |
|-----------------------------|------------|-------------------|-------------------|-------------------|
|                             |            | NP-10+NP-20+NP-30 | NP-40+NP-50+NP-60 | NP-70+NP-80+NP-90 |
| <b>Z-Average (d.nm)</b>     | water      | 311.7 ± 4.4       | 182.3 ± 3.4       | 262.5 ± 9.6       |
|                             | 0.05% BSA  | 243.5 ± 1.3       | 264.6 ± 7.2       | 230.7 ± 1.1       |
|                             | 0.1 % SDS  | 265.7 ± 5.9       | 256.8 ± 3.3       | 215.6 ± 1.6       |
| <b>Polydispersity index</b> | water      | 0.375 ± 0.026     | 0.309 ± 0.034     | 0.540 ± 0.073     |
|                             | 0.05% BSA  | 0.352 ± 0.037     | 0.271 ± 0.010     | 0.269 ± 0.011     |
|                             | 0.1 % SDS  | 0.351 ± 0.041     | 0.336 ± 0.026     | 0.260 ± 0.050     |

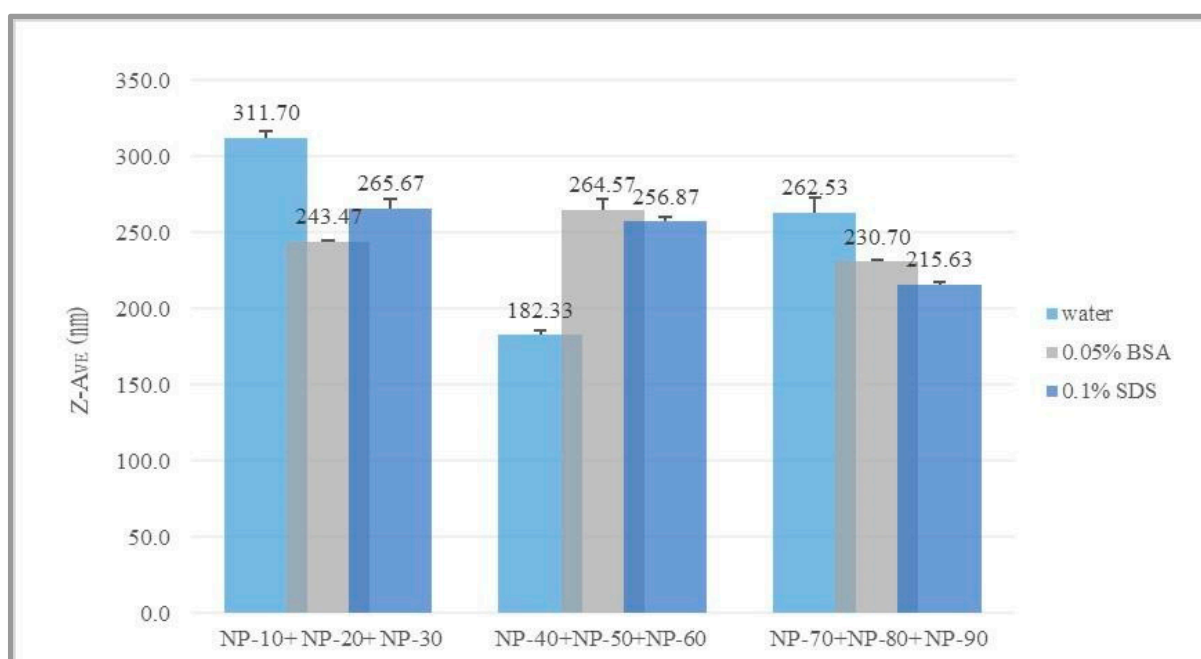

**Figure S5.** Hydrodynamic diameter (d.nm) of **NPs washed** obtained from combined fractions: NP-10, NP-20 and NP-30 (denoted **NP-10+NP-20+NP-30**); NP-40, NP-50 and NP-60 (denoted **NP-40+NP-50+NP-60**); NP-70, NP-80 and NP-90 (denoted **NP-70+NP-80+NP-90**) dispersed in different dispersants: water, 0.05% BSA and 0.1% SDS.

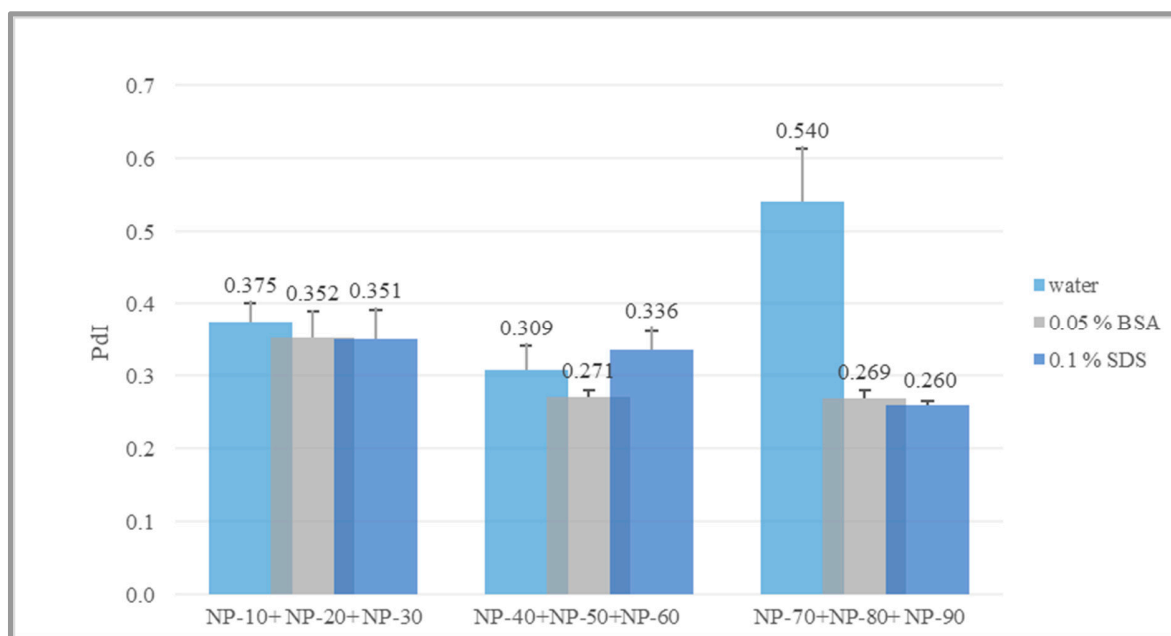

**Figure S6.** Polydispersity index of NPs washed obtained from combined fractions: NP-10, NP-20 and NP-30 (denoted **NP-10+NP-20+NP-30**); NP-40, NP-50 and NP-60 (denoted **NP-40+NP-50+NP-60**); NP-70, NP-80 and NP-90 (denoted **NP-70+NP-80+NP-90**) dispersed in different dispersants: water, 0.05% BSA and 0.1% SDS.

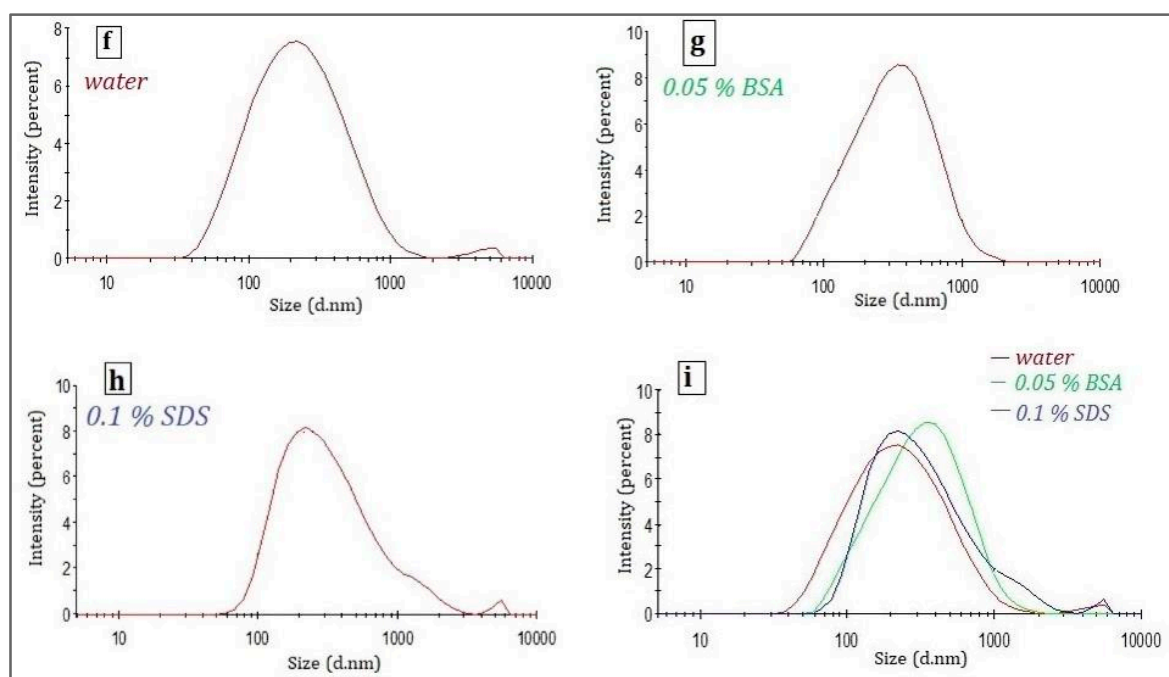

**Figure S7.** Size distributions (by **intensity percentage**) of NPs washed suspended in different dispersants ((f)-water, (g)-BSA (0.05%), (h)-SDS (0.1 %)); (i)-combined graphs of different dispersants. Size distributions are shown for NPs obtained from combined fractions: **NP-40, NP-50 and NP-60**.

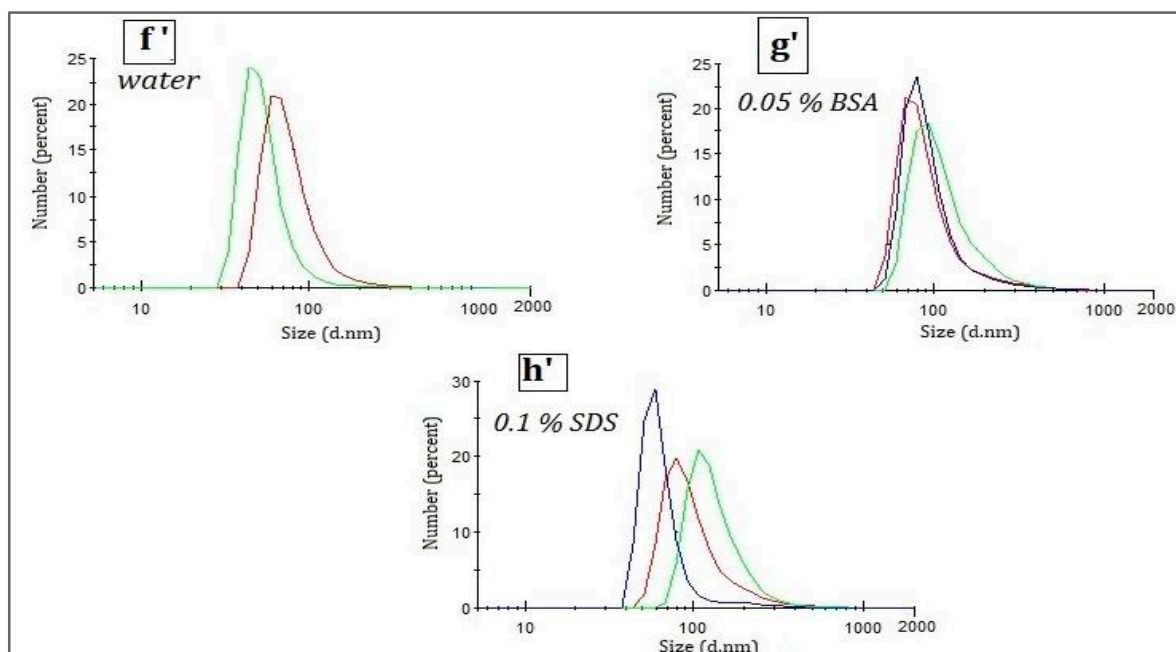

**Figure S8.** Size distributions (by **number percentage**) of NPs **washed** suspended in different dispersants: ((f')-water, (g')-BSA (0.05%), (h')-SDS (0.1 %)). Distributions are shown for NPs obtained from combined fractions: NP-40, NP-50 and NP-60. Additionally multiple consecutive measurements (lines with different colors) are presented.

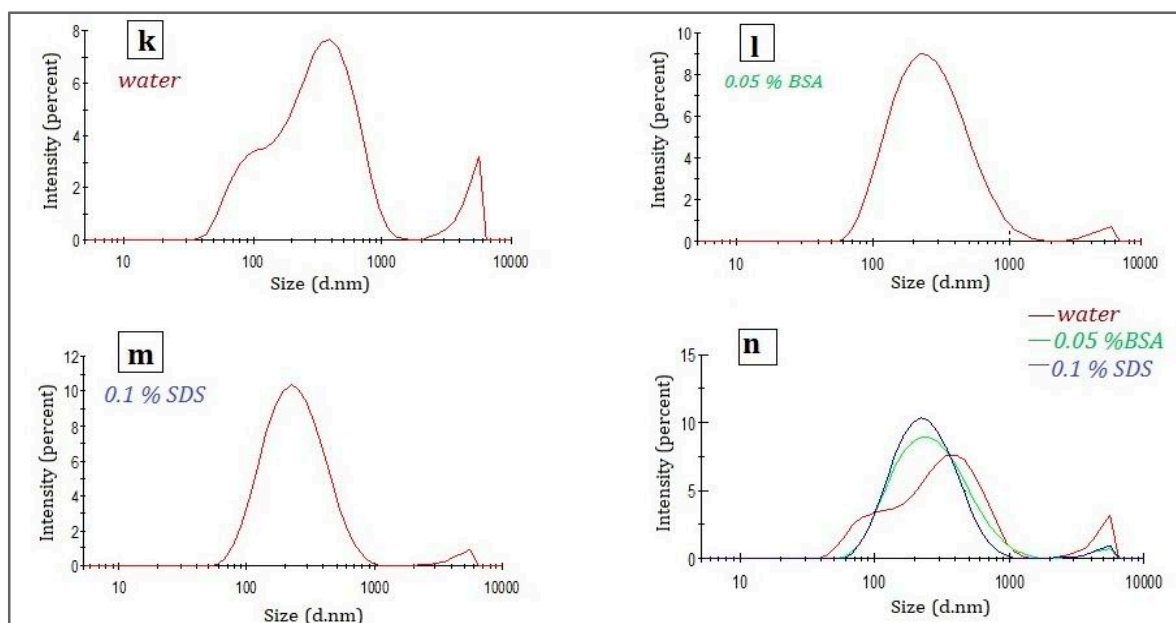

**Figure S9.** Size distributions (by **intensity percentage**) of NPs **washed** suspended in different dispersants ((k)-water, (l)-BSA (0.05%), (m)-SDS (0.1 %)); (n)-combined graphs of different dispersants. Size distributions are shown for NPs obtained from combined fractions: NP-70, NP-80 and NP-90.

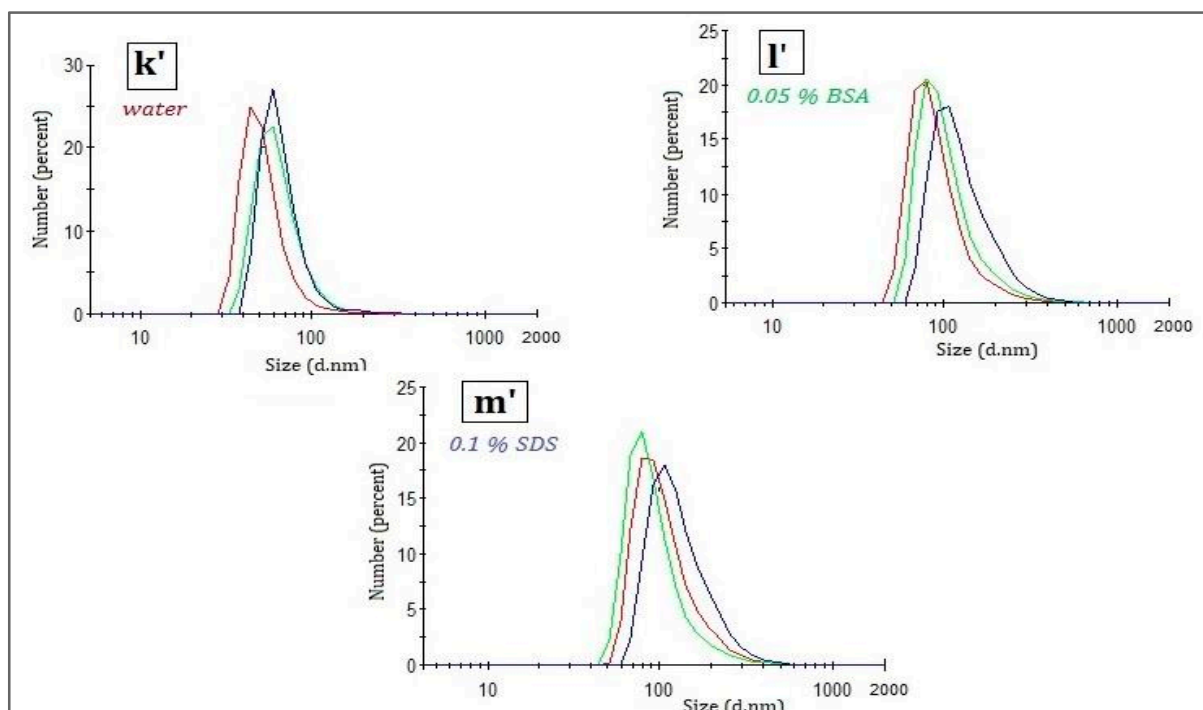

**Figure S10.** Size distributions (by **number percentage**) of NPs **washed** suspended in different dispersants ((k')-water, (l')-BSA (0.05%), (m')-SDS (0.1 %)). Distributions are shown for NPs obtained from combined fractions: NP-70, NP-80 and NP-90. Additionally multiple consecutive measurements (lines with different colors) are presented.

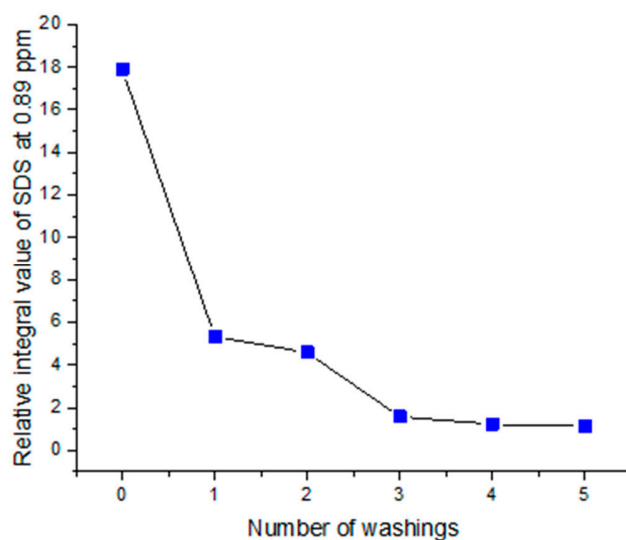

**Figure S11.** Relative quantification of SDS contamination in relation to PET signal in NMR.



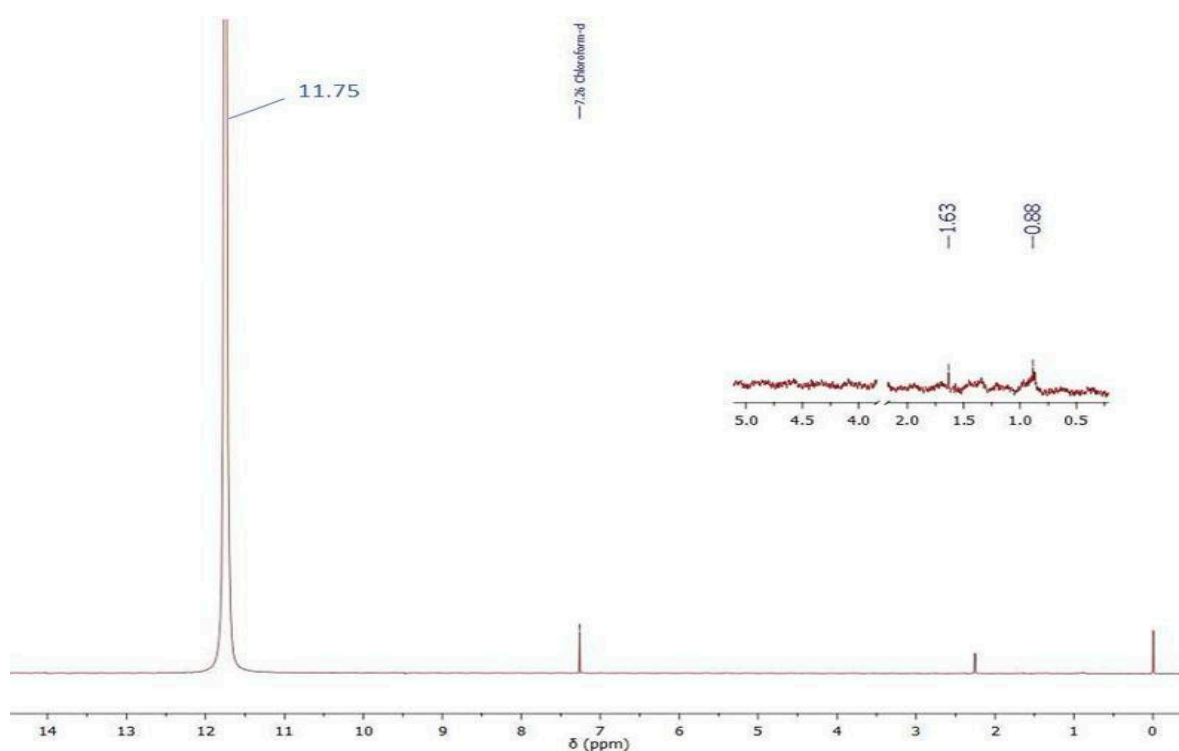

**Figure S12.**  $^1\text{H}$  NMR spectrum (400 MHz) of trifluoroacetic acid (TFA) recording with addition of deuterated chloroform ( $\text{CDCl}_3$ ) in the ratio 4:1 (*v,v*, respectively). Region importance for process monitoring of washing process of NPs (0.5- 2.0 ppm and 4.0- 5.0 ppm) is zoomed. Signal at 11.75 ppm originates from TFA; signals with chemical shifts values 0.88 and 1.63 ppm indicate the presence of impurities in very low concentrations.

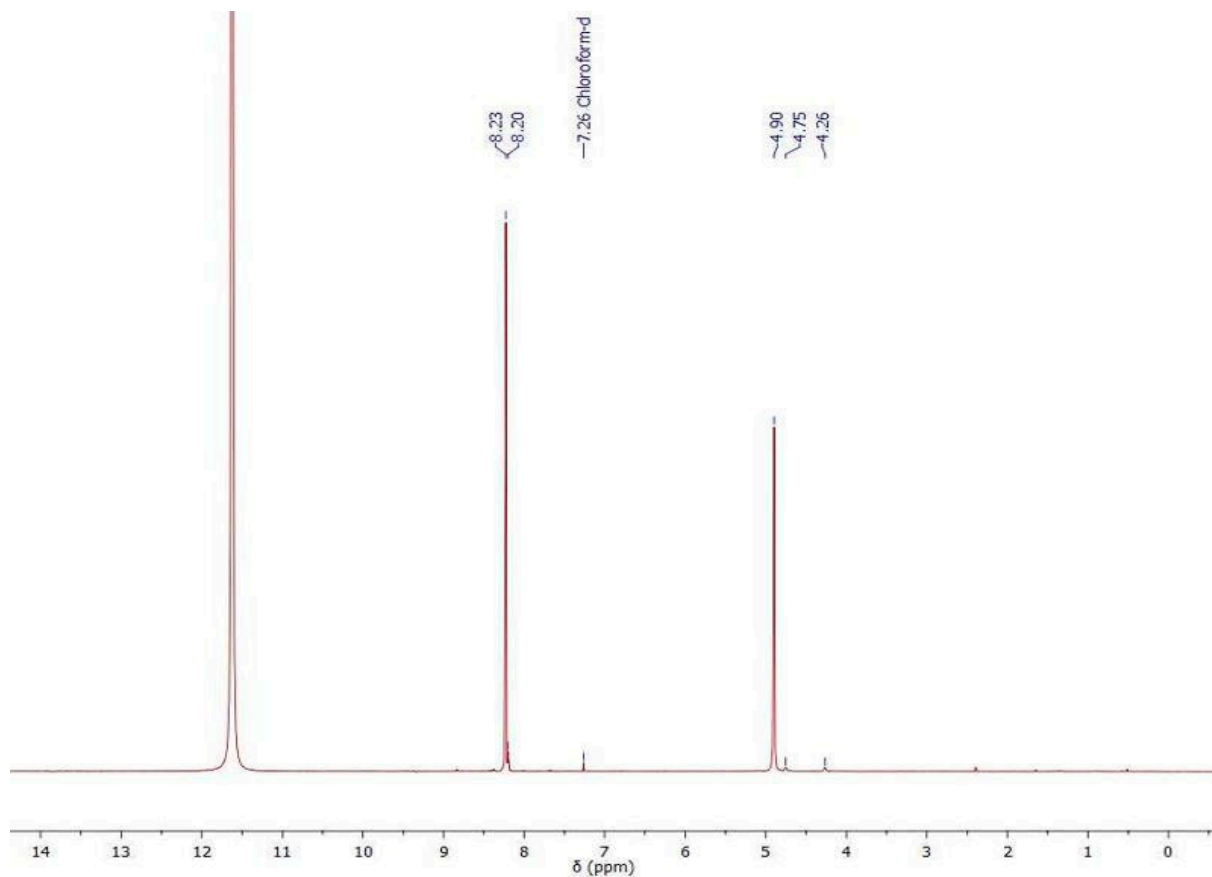

**Figure S13.**  $^1\text{H}$  NMR spectrum (400 MHz) of PET pellet (starting material) recorded in the mixture of TFA and  $\text{CDCl}_3$  in the ratio 4:1 (*v/v*). The use of this mixture containing the fluorinated solvent is advantageous, since it allows room temperature spectra [ref. 37 in main text]. Characteristic signals at 8.20- 8.23 (aromatic protons), 4.90 (internal methylene groups), and low intensity signals at 4.75 and 4.26 ppm (the methylene protons adjacent to the hydroxyl end functions) are consistent with reported literature data [ref. 38, 39 in main text].

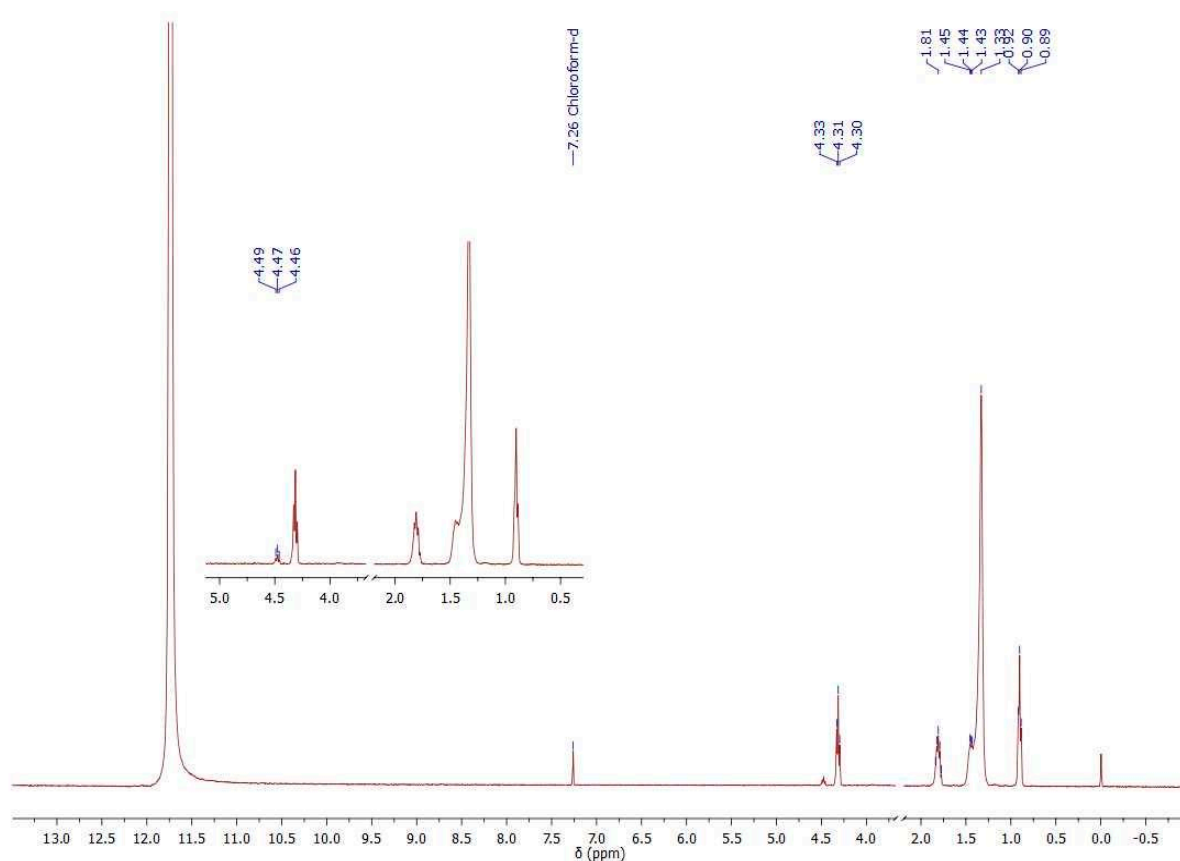

**Figure S14.**  $^1\text{H}$  NMR spectrum (400 MHz) of sodium dodecyl sulfate (SDS) recorded in the mixture of TFA and  $\text{CDCl}_3$  in the ratio 4:1 ( $v/v$ ). The peaks at regions 0.89-0.92, 1.33-1.45, 1.81 and 4.30-4.33 ppm originate from SDS. In the magnified part of the spectrum a low intensity signal with chemical shift of 4.46-4.49 ppm is visible. The intensity of this impurity decreases during the washing process of NPs from SDS; already after third washing, this peak is not visible in the NMR spectrum (Figure 1B).

**Table S2. P-Values for hemolysis experiment for Donor 1 (Figure 4A)**

| Samples                                                                                        | Adjusted P Value |
|------------------------------------------------------------------------------------------------|------------------|
| 0.9% NaCl + NPs unwashed 10 $\mu\text{g/ml}$ vs. 0.9% NaCl + NPs unwashed 1 $\mu\text{g/ml}$   | <0.0001          |
| 0.9% NaCl + NPs unwashed 10 $\mu\text{g/ml}$ vs. 0.9% NaCl + NPs unwashed 0.1 $\mu\text{g/ml}$ | <0.0001          |
| 0.9% NaCl + NPs unwashed 10 $\mu\text{g/ml}$ vs. 0.9% NaCl + NPs washed 10 $\mu\text{g/ml}$    | <0.0001          |
| 0.9% NaCl + NPs unwashed 10 $\mu\text{g/ml}$ vs. 0.9% NaCl + NPs washed 1 $\mu\text{g/ml}$     | <0.0001          |

|                                                                         |         |
|-------------------------------------------------------------------------|---------|
| 0.9% NaCl + NPs unwashed 10 µg/ml vs. 0.9% NaCl + NPs washed 0.1 µg/ml  | <0.0001 |
| 0.9% NaCl + NPs unwashed 10 µg/ml vs. 0.9% NaCl                         | <0.0001 |
| 0.9% NaCl + NPs unwashed 10 µg/ml vs. 0.98%NaCl                         | <0.0001 |
| 0.9% NaCl + NPs unwashed 10 µg/ml vs. 0.9% NaCl + 0.0003%SDS            | <0.0001 |
| 0.9% NaCl + NPs unwashed 1 µg/ml vs. 0.9% NaCl + NPs unwashed 0.1 µg/ml | 0.0378  |
| 0.9% NaCl + NPs unwashed 1 µg/ml vs. 0.9% NaCl + NPs washed 10 µg/ml    | 0.2876  |
| 0.9% NaCl + NPs unwashed 1 µg/ml vs. 0.9% NaCl + NPs washed 1 µg/ml     | 0.3772  |
| 0.9% NaCl + NPs unwashed 1 µg/ml vs. 0.9% NaCl + NPs washed 0.1 µg/ml   | 0.2876  |
| 0.9% NaCl + NPs unwashed 1 µg/ml vs. 0.9% NaCl                          | 0.0698  |
| 0.9% NaCl + NPs unwashed 1 µg/ml vs. 0.98%NaCl                          | 0.1396  |
| 0.9% NaCl + NPs unwashed 1 µg/ml vs. 0.9% NaCl + 0.0003%SDS             | 0.0994  |
| 0.9% NaCl + NPs unwashed 0.1 µg/ml vs. 0.9% NaCl + NPs washed 10 µg/ml  | 0.0002  |
| 0.9% NaCl + NPs unwashed 0.1 µg/ml vs. 0.9% NaCl + NPs washed 1 µg/ml   | 0.9124  |
| 0.9% NaCl + NPs unwashed 0.1 µg/ml vs. 0.9% NaCl + NPs washed 0.1 µg/ml | 0.9611  |
| 0.9% NaCl + NPs unwashed 0.1 µg/ml vs. 0.9% NaCl                        | >0.9999 |
| 0.9% NaCl + NPs unwashed 0.1 µg/ml vs. 0.98%NaCl                        | 0.9983  |
| 0.9% NaCl + NPs unwashed 0.1 µg/ml vs. 0.9% NaCl + 0.0003%SDS           | 0.9998  |
| 0.9% NaCl + NPs washed 10 µg/ml vs. 0.9% NaCl + NPs washed 1 µg/ml      | 0.0033  |
| 0.9% NaCl + NPs washed 10 µg/ml vs. 0.9% NaCl + NPs washed 0.1 µg/ml    | 0.0022  |
| 0.9% NaCl + NPs washed 10 µg/ml vs. 0.9% NaCl                           | 0.0004  |
| 0.9% NaCl + NPs washed 10 µg/ml vs. 0.98%NaCl                           | 0.0009  |
| 0.9% NaCl + NPs washed 10 µg/ml vs. 0.9% NaCl + 0.0003%SDS              | 0.0006  |
| 0.9% NaCl + NPs washed 1 µg/ml vs. 0.9% NaCl + NPs washed 0.1 µg/ml     | >0.9999 |
| 0.9% NaCl + NPs washed 1 µg/ml vs. 0.9% NaCl                            | 0.9803  |
| 0.9% NaCl + NPs washed 1 µg/ml vs. 0.98%NaCl                            | 0.9991  |

|                                                             |         |
|-------------------------------------------------------------|---------|
| 0.9% NaCl + NPs washed 1 µg/ml vs. 0.9% NaCl + 0.0003%SDS   | 0.9947  |
| 0.9% NaCl + NPs washed 0.1 µg/ml vs. 0.9% NaCl              | 0.9947  |
| 0.9% NaCl + NPs washed 0.1 µg/ml vs. 0.98%NaCl              | >0.9999 |
| 0.9% NaCl + NPs washed 0.1 µg/ml vs. 0.9% NaCl + 0.0003%SDS | 0.9991  |
| 0.9% NaCl vs. 0.98%NaCl                                     | >0.9999 |
| 0.9% NaCl vs. 0.9% NaCl + 0.0003%SDS                        | >0.9999 |
| 0.98%NaCl vs. 0.9% NaCl + 0.0003%SDS                        | >0.9999 |

**Table S3. P-Values for hemolysis experiment for Donor 2 (Figure 4B)**

| Samples                                                                  | Adjusted P Value |
|--------------------------------------------------------------------------|------------------|
| 0.9% NaCl + NPs unwashed 10 µg/ml vs. 0.9% NaCl + NPs unwashed 1 µg/ml   | <0.0001          |
| 0.9% NaCl + NPs unwashed 10 µg/ml vs. 0.9% NaCl + NPs unwashed 0.1 µg/ml | <0.0001          |
| 0.9% NaCl + NPs unwashed 10 µg/ml vs. 0.9% NaCl + NPs washed 10 µg/ml    | <0.0001          |
| 0.9% NaCl + NPs unwashed 10 µg/ml vs. 0.9% NaCl + NPs washed 1 µg/ml     | <0.0001          |
| 0.9% NaCl + NPs unwashed 10 µg/ml vs. 0.9% NaCl + NPs washed 0.1 µg/ml   | <0.0001          |
| 0.9% NaCl + NPs unwashed 10 µg/ml vs. 0.9% NaCl                          | <0.0001          |
| 0.9% NaCl + NPs unwashed 10 µg/ml vs. 0.98%NaCl                          | <0.0001          |
| 0.9% NaCl + NPs unwashed 10 µg/ml vs. 0.9% NaCl + 0.0003%SDS             | <0.0001          |
| 0.9% NaCl + NPs unwashed 1 µg/ml vs. 0.9% NaCl + NPs unwashed 0.1 µg/ml  | 0.0001           |
| 0.9% NaCl + NPs unwashed 1 µg/ml vs. 0.9% NaCl + NPs washed 10 µg/ml     | <0.0001          |
| 0.9% NaCl + NPs unwashed 1 µg/ml vs. 0.9% NaCl + NPs washed 1 µg/ml      | 0.0381           |
| 0.9% NaCl + NPs unwashed 1 µg/ml vs. 0.9% NaCl + NPs washed 0.1 µg/ml    | 0.0004           |
| 0.9% NaCl + NPs unwashed 1 µg/ml vs. 0.9% NaCl                           | 0.0003           |
| 0.9% NaCl + NPs unwashed 1 µg/ml vs. 0.98%NaCl                           | <0.0001          |
| 0.9% NaCl + NPs unwashed 1 µg/ml vs. 0.9% NaCl + 0.0003%SDS              | <0.0001          |

|                                                                         |         |
|-------------------------------------------------------------------------|---------|
| 0.9% NaCl + NPs unwashed 0.1 µg/ml vs. 0.9% NaCl + NPs washed 10 µg/ml  | <0.0001 |
| 0.9% NaCl + NPs unwashed 0.1 µg/ml vs. 0.9% NaCl + NPs washed 1 µg/ml   | 0.1761  |
| 0.9% NaCl + NPs unwashed 0.1 µg/ml vs. 0.9% NaCl + NPs washed 0.1 µg/ml | 0.9995  |
| 0.9% NaCl + NPs unwashed 0.1 µg/ml vs. 0.9% NaCl                        | 0.9999  |
| 0.9% NaCl + NPs unwashed 0.1 µg/ml vs. 0.98%NaCl                        | 0.9999  |
| 0.9% NaCl + NPs unwashed 0.1 µg/ml vs. 0.9% NaCl + 0.0003%SDS           | 0.4936  |
| 0.9% NaCl + NPs washed 10 µg/ml vs. 0.9% NaCl + NPs washed 1 µg/ml      | <0.0001 |
| 0.9% NaCl + NPs washed 10 µg/ml vs. 0.9% NaCl + NPs washed 0.1 µg/ml    | <0.0001 |
| 0.9% NaCl + NPs washed 10 µg/ml vs. 0.9% NaCl                           | <0.0001 |
| 0.9% NaCl + NPs washed 10 µg/ml vs. 0.98%NaCl                           | <0.0001 |
| 0.9% NaCl + NPs washed 10 µg/ml vs. 0.9% NaCl + 0.0003%SDS              | <0.0001 |
| 0.9% NaCl + NPs washed 1 µg/ml vs. 0.9% NaCl + NPs washed 0.1 µg/ml     | 0.4269  |
| 0.9% NaCl + NPs washed 1 µg/ml vs. 0.9% NaCl                            | 0.3649  |
| 0.9% NaCl + NPs washed 1 µg/ml vs. 0.98%NaCl                            | 0.0755  |
| 0.9% NaCl + NPs washed 1 µg/ml vs. 0.9% NaCl + 0.0003%SDS               | 0.0027  |
| 0.9% NaCl + NPs washed 0.1 µg/ml vs. 0.9% NaCl                          | >0.9999 |
| 0.9% NaCl + NPs washed 0.1 µg/ml vs. 0.98%NaCl                          | 0.9735  |
| 0.9% NaCl + NPs washed 0.1 µg/ml vs. 0.9% NaCl + 0.0003%SDS             | 0.2141  |
| 0.9% NaCl vs. 0.98%NaCl                                                 | 0.9870  |
| 0.9% NaCl vs. 0.9% NaCl + 0.0003%SDS                                    | 0.2582  |
| 0.98%NaCl vs. 0.9% NaCl + 0.0003%SDS                                    | 0.7696  |

**Table S4. P-Values for hemolysis experiment for Donor 3 (Figure 4C)**

| Samples                                                                | Adjusted P Value |
|------------------------------------------------------------------------|------------------|
| 0.9% NaCl + NPs unwashed 10 µg/ml vs. 0.9% NaCl + NPs unwashed 1 µg/ml | <0.0001          |

|                                                                          |         |
|--------------------------------------------------------------------------|---------|
| 0.9% NaCl + NPs unwashed 10 µg/ml vs. 0.9% NaCl + NPs unwashed 0.1 µg/ml | <0.0001 |
| 0.9% NaCl + NPs unwashed 10 µg/ml vs. 0.9% NaCl + NPs washed 10 µg/ml    | 0.3980  |
| 0.9% NaCl + NPs unwashed 10 µg/ml vs. 0.9% NaCl + NPs washed 1 µg/ml     | <0.0001 |
| 0.9% NaCl + NPs unwashed 10 µg/ml vs. 0.9% NaCl + NPs washed 0.1 µg/ml   | <0.0001 |
| 0.9% NaCl + NPs unwashed 10 µg/ml vs. 0.9% NaCl                          | <0.0001 |
| 0.9% NaCl + NPs unwashed 10 µg/ml vs. 0.98%NaCl                          | <0.0001 |
| 0.9% NaCl + NPs unwashed 10 µg/ml vs. 0.9% NaCl + 0.0003%SDS             | <0.0001 |
| 0.9% NaCl + NPs unwashed 1 µg/ml vs. 0.9% NaCl + NPs unwashed 0.1 µg/ml  | 0.0009  |
| 0.9% NaCl + NPs unwashed 1 µg/ml vs. 0.9% NaCl + NPs washed 10 µg/ml     | <0.0001 |
| 0.9% NaCl + NPs unwashed 1 µg/ml vs. 0.9% NaCl + NPs washed 1 µg/ml      | 0.2124  |
| 0.9% NaCl + NPs unwashed 1 µg/ml vs. 0.9% NaCl + NPs washed 0.1 µg/ml    | 0.0058  |
| 0.9% NaCl + NPs unwashed 1 µg/ml vs. 0.9% NaCl                           | 0.0009  |
| 0.9% NaCl + NPs unwashed 1 µg/ml vs. 0.98%NaCl                           | 0.2962  |
| 0.9% NaCl + NPs unwashed 1 µg/ml vs. 0.9% NaCl + 0.0003%SDS              | 0.3450  |
| 0.9% NaCl + NPs unwashed 0.1 µg/ml vs. 0.9% NaCl + NPs washed 10 µg/ml   | <0.0001 |
| 0.9% NaCl + NPs unwashed 0.1 µg/ml vs. 0.9% NaCl + NPs washed 1 µg/ml    | 0.4545  |
| 0.9% NaCl + NPs unwashed 0.1 µg/ml vs. 0.9% NaCl + NPs washed 0.1 µg/ml  | 0.9990  |
| 0.9% NaCl + NPs unwashed 0.1 µg/ml vs. 0.9% NaCl                         | >0.9999 |
| 0.9% NaCl + NPs unwashed 0.1 µg/ml vs. 0.98%NaCl                         | 0.3450  |
| 0.9% NaCl + NPs unwashed 0.1 µg/ml vs. 0.9% NaCl + 0.0003%SDS            | 0.2962  |
| 0.9% NaCl + NPs washed 10 µg/ml vs. 0.9% NaCl + NPs washed 1 µg/ml       | <0.0001 |
| 0.9% NaCl + NPs washed 10 µg/ml vs. 0.9% NaCl + NPs washed 0.1 µg/ml     | <0.0001 |
| 0.9% NaCl + NPs washed 10 µg/ml vs. 0.9% NaCl                            | <0.0001 |
| 0.9% NaCl + NPs washed 10 µg/ml vs. 0.98%NaCl                            | <0.0001 |
| 0.9% NaCl + NPs washed 10 µg/ml vs. 0.9% NaCl + 0.0003%SDS               | <0.0001 |

|                                                                     |         |
|---------------------------------------------------------------------|---------|
| 0.9% NaCl + NPs washed 1 µg/ml vs. 0.9% NaCl + NPs washed 0.1 µg/ml | 0.8485  |
| 0.9% NaCl + NPs washed 1 µg/ml vs. 0.9% NaCl                        | 0.4545  |
| 0.9% NaCl + NPs washed 1 µg/ml vs. 0.98%NaCl                        | >0.9999 |
| 0.9% NaCl + NPs washed 1 µg/ml vs. 0.9% NaCl + 0.0003%SDS           | >0.9999 |
| 0.9% NaCl + NPs washed 0.1 µg/ml vs. 0.9% NaCl                      | 0.9990  |
| 0.9% NaCl + NPs washed 0.1 µg/ml vs. 0.98%NaCl                      | 0.7503  |
| 0.9% NaCl + NPs washed 0.1 µg/ml vs. 0.9% NaCl + 0.0003%SDS         | 0.6940  |
| 0.9% NaCl vs. 0.98%NaCl                                             | 0.3450  |
| 0.9% NaCl vs. 0.9% NaCl + 0.0003%SDS                                | 0.2962  |
| 0.98%NaCl vs. 0.9% NaCl + 0.0003%SDS                                | >0.9999 |

**Table S5. P-Values for hemolysis experiment in Ringer solution (Figure 5)**

| Samples                                                                   | Adjusted P Value |
|---------------------------------------------------------------------------|------------------|
| Ringer vs. Ringer Glc HSA                                                 | <0.0001          |
| Ringer vs. NPs unwashed 10 µg/mL + Ringer                                 | <0.0001          |
| Ringer vs. NPs washed 10 µg/mL + Ringer                                   | <0.0001          |
| Ringer vs. NPs unwashed 10 µg/mL + Ringer Glc HSA                         | 0.0001           |
| Ringer vs. NPs washed 10 µg/mL + Ringer Glc HSA                           | 0.0003           |
| Ringer Glc HSA vs. NPs unwashed 10 µg/mL + Ringer                         | <0.0001          |
| Ringer Glc HSA vs. NPs washed 10 µg/mL + Ringer                           | <0.0001          |
| Ringer Glc HSA vs. NPs unwashed 10 µg/mL + Ringer Glc HSA                 | 0.0023           |
| Ringer Glc HSA vs. NPs washed 10 µg/mL + Ringer Glc HSA                   | 0.0011           |
| NPs unwashed 10 µg/mL + Ringer vs. NPs washed 10 µg/mL + Ringer           | <0.0001          |
| NPs unwashed 10 µg/mL + Ringer vs. NPs unwashed 10 µg/mL + Ringer Glc HSA | <0.0001          |
| NPs unwashed 10 µg/mL + Ringer vs. NPs washed 10 µg/mL + Ringer Glc HSA   | <0.0001          |



|                                                                                 |         |
|---------------------------------------------------------------------------------|---------|
| NPs washed 10 µg/mL + Ringer vs. NPs unwashed 10 µg/mL + Ringer Glc HSA         | <0.0001 |
| NPs washed 10 µg/mL + Ringer vs. NPs washed 10 µg/mL + Ringer Glc HSA           | <0.0001 |
| NPs unwashed 10 µg/mL + Ringer Glc HSA vs. NPs washed 10 µg/mL + Ringer Glc HSA | 0.9997  |
